1 **Title:** Are Mobile Phones part of the chain of transmission of SARS-CoV-2 in the hospital?

2 **Keywords:** SARS-CoV-2 hospital cross-contamination, Healthcare workers mobile phones,  
3 SARS-CoV-2 fomites.

4 **Authors:**

5 Evelyn Patricia Sánchez Espinoza<sup>1</sup>, Marina Cortes Farrel<sup>2</sup>, Saidy Vasconez Nogueira<sup>3</sup>,  
6 Anderson Vicente de Paula<sup>4</sup>, Thais Guimarães<sup>5</sup>, Lucy Santos Villas Boas<sup>6</sup>, Marcelo Park<sup>7</sup>,  
7 Cristina Carvalho da Silva<sup>8</sup>, Ingra Morales<sup>9</sup>, Lauro Vieira Perdigão Neto<sup>10</sup>, Tania Regina  
8 Tozetto-Mendoza<sup>11</sup>, Icaro Boszczowski<sup>12</sup>, Ester Sabino<sup>13</sup>, Maria Cássia Mendes-Correa<sup>14</sup>,  
9 Anna Sara Shafferman Levin<sup>15</sup>, Silvia Figueiredo Costa<sup>16</sup>.

10

11 **Affiliations:**

12 <sup>1</sup> Department of Infectious Diseases, Faculdade de Medicina, Universidade de São Paulo, São Paulo, Brazil.

13 <sup>2</sup> Department of Infectious Diseases, Faculdade de Medicina, Universidade de São Paulo, São Paulo, Brazil.

14 <sup>3</sup> Department of Infectious Diseases, Faculdade de Medicina, Universidade de São Paulo, São Paulo, Brazil.

15 <sup>4</sup> LIM52 Virology Laboratory, Universidade de São Paulo, São Paulo, Brazil

16 <sup>5</sup> Hospital das Clinicas, Faculdade de Medicina, Universidade de São Paulo, São Paulo, Brazil.

17 <sup>6</sup> LIM52 Virology Laboratory, Universidade de São Paulo, São Paulo, Brazil

18 <sup>7</sup> Hospital das Clinicas, Faculdade de Medicina, Universidade de São Paulo, São Paulo, Brazil.

19 <sup>8</sup> Hospital das Clinicas, Faculdade de Medicina, Universidade de São Paulo, São Paulo, Brazil.

20 <sup>9</sup> Department of Infectious Diseases, Faculdade de Medicina, Universidade de São Paulo, São Paulo, Brazil.

21 <sup>10</sup> Hospital das Clinicas, Faculdade de Medicina, Universidade de São Paulo, São Paulo, Brazil.

22 **NOTE:** This preprint reports new research that has not been certified by peer review and should not be used to guide clinical practice.  
<sup>11</sup> LIM52 Virology Laboratory, Universidade de São Paulo, São Paulo, Brazil.

23 <sup>12</sup> Hospital das Clinicas, Faculdade de Medicina, Universidade de São Paulo, São Paulo, Brazil.

24 <sup>13</sup> Department of Infectious Diseases, Faculdade de Medicina, Universidade de São Paulo, São Paulo, Brazil.

25 <sup>14</sup>Department of Infectious Diseases, Faculdade de Medicina, Universidade de São Paulo

26 <sup>15</sup> Department of Infectious Diseases, Faculdade de Medicina, Universidade de São Paulo, São Paulo, Brazil.

27 <sup>16</sup>Department of Infectious diseases, Instituto de Medicina Tropical, Universidade de São Paulo, São Paulo,  
28 Brazil.

29 **Corresponding author:**

30 Evelyn Patricia Sanchez Espinoza

31 Universidade de Sao Paulo, São Paulo, Brazil

32 Address: Av. Dr. Enéas Carvalho de Aguiar, 470 - Cerqueira César, São Paulo - SP,  
33 05403-000

34 E-mail: nylevezehcnas@yahoo.com

35 Phone: +55(11) 943558668

36

37

38

39 **Funding:** This work was supported by using materials from LIM-49 Bacteriology Laboratory

40 from the Universidade de Sao Paulo. No grants were used for this work.

41 **Conflict of Interests:** The authors do not have conflict of interests. There are no

42 organizations of persons with financial interest in the subject of this research.

43

44

45

46

47 **Abstract**

48 SARS-CoV-2 cross-transmission has become an concern in hospitals. We investigate  
49 healthcare workers(HCWs) knowledge about SARS-CoV-2 cross-transmission and  
50 conceptions whether the virus can remain on HCWs mobile phones(MPs) and be part of the  
51 chain of transmission.

52 A cross-sectional study was conducted at a COVID-19 Intensive Care Unit of a teaching-  
53 hospital. Fifty-one MPs were swabbed and a questionnaire about hand hygiene and MP use and  
54 disinfection was applied after an educational campaign. Although most of HCWs believed on  
55 the importance of cross-transmission and increased hand hygiene adhesion and MP disinfection  
56 during the pandemic, SARS-CoV-2 RNA was detected in two MPs(culture of the samples was  
57 negative).

58 Implementation of official hospital policies to guide HCWs regarding disinfection and care of  
59 personal MP are needed.

60

61

62

63

64

65

66

67

68

## 69 **Introduction**

70 Mobile phones(MPs) have become a working-tool. However, there are no official policies from  
71 the Centres for Disease Control and Prevention(CDC) about its disinfection in healthcare  
72 facilities. Permanence of SARS-CoV-2 in surfaces of hospital environment has been described<sup>1</sup>  
73 raising the concern about cross-transmission<sup>2</sup>. Even though SARS-CoV-2 has been found in  
74 MPs of patients with COVID-19<sup>3</sup>, they have not been portrayed as source of transmission in  
75 the hospital.

## 76 **Material and methods**

77 This is a cross-sectional study performed at an adult Intensive Care Unit(ICU) of a teaching  
78 hospital in Sao Paulo, Brazil. The ICU has 11 separated patient-rooms.

79 Healthcare workers(HCWs) use scrubs, N95-respirators and surgical-cap inside of the unit and  
80 add a surgical-gown, face shield and gloves when entering a patient's room.

81 An educational campaign about cross-transmission and disinfection of MPs was performed at  
82 the beginning of the pandemic. Informative posters were left in the unit that had a QR-code  
83 with access to a video of the campaign advising to use 70% alcohol swab on MPs and to place  
84 a screen protector to protect the MP oleophobic coating; and avoid the use of MPs during  
85 patient care and in the restroom.

86 Ten days after the campaign we collected samples from HCW's MPs. Herewith an electronic  
87 questionnaire was applied. It included queried conceptions about hand hygiene and MP care.

88 The MPs were swabbed using a nylon FLOQ Swab™(Copan Italia SPA-Italy) beginning with  
89 the front-screen and without taking its cases off. Once sampled, swabs were placed in universal  
90 transport medium(UTM™ Copan Italia SPA-Italy) stored at -80°C and submitted to SARS-  
91 CoV-2 RT-PCR. Positive RT-PCR samples were submitted to viral culture.

92 The extraction of nucleic acids was performed using QIAmp viral RNA mini kit(QIAGEN-  
93 USA). For the RT-PCR assay, the commercial RealStar®SARS-CoV-2 Kit1.0(Altona-  
94 Diagnostics-Germany) that detects the presence of SARS-CoV-2 through amplification of the  
95 S-gene and E-gene was used. The amplification was done using the Roche Light Cycler®  
96 96System(USA). According to the manufacturer, the sample is considered positive when one  
97 of the target genes is detected.

126 Culture was performed inoculating Vero cells (ATCC® CCL-81™), as previously described  
127 <sup>45</sup>, in Dulbecco minimal essential medium supplemented with fetal bovine serum(5%),  
128 antibiotics and antimycotics(Cultilab, Campinas, São Paulo, [www.cultilab.com.br](http://www.cultilab.com.br)) at 37°C in  
129 an atmosphere with 5%CO<sub>2</sub>. Every day the cells were examined for cytopathic effect(CE),  
130 new RT-PCR of the samples and blind passage of culture supernatant was performed on the  
131 third, seven and fourteen day of culture.

## 132 **Results**

133 Fifty-one of the fifty-three HCWs working in the unit participated on the survey and responded  
134 the questionnaire. Nine(18%) had covered their MP with kitchen-plastic film in an attempt to  
135 facilitate disinfection. Eleven(16%) did not recall the educational campaign and three(6%)  
136 answered that it did not change their behaviour. Only four(8%) did not believe that the virus  
137 could remain on MPs and one(4%) did not believe that the virus could remain on the hands;  
138 98% referred washing their hands more since the pandemic(Table1).

139 Twenty-two COVID-19 patients were hospitalized in the unit, eleven(50%) had positive  
140 SARS-CoV-2 RT-PCR and twenty(91%) had a lung computed-tomography suggestive of  
141 COVID-19.

142

**Table 1. Detection of SARS-CoV-2 by real-time polymerase chain reaction(RT-PCR) on mobile phones (MPs), and healthcare workers' ideas on hand hygiene and mobile phone use during the pandemic**

145

| RT-PCR result / Answer to questionnaire | Attending physician (n=7) | Cleaning staff (n=5) | Nurse (n=7) | Nursing assistant (n=17) | Physiotherapist (n=5) | Resident/ Fellow (n=10) | Total (n=51) |
|-----------------------------------------|---------------------------|----------------------|-------------|--------------------------|-----------------------|-------------------------|--------------|
| Positive RT-PCR on Mobile phones        | 0                         | 0                    | 1(14%)      | 1(6%)                    | 0                     | 0                       | 3(6%)        |
| Believes SARS-CoV-2 can stay on hands   | 7(100%)                   | 4(80%)               | 7(100%)     | 16(94%)                  | 5(100%)               | 10(100%)                | 49(96%)      |
| Increased hand-hygiene after COVID-19   | 6(86%)                    | 5(100%)              | 7(100%)     | 17(100%)                 | 5(100%)               | 10(100%)                | 50(98%)      |
| Believes SARS-CoV-2 can remain on MPs   | 7(100%)                   | 4(80%)               | 7(100%)     | 14(82%)                  | 5(100%)               | 10(100%)                | 47(92%)      |
| Increased cleaning of MP after COVID-19 | 6(86%)                    | 5(100%)              | 7(100%)     | 16(94%)                  | 5(100%)               | 9(90%)                  | 48(94%)      |

146

147

148 Fifty-one MP swabs were collected, two were positive by RT-PCR(4%), with C<sub>t</sub> values of 34  
149 and 36, both detected the E-gene.

150 The two RT-PCR positive samples were isolated for viral culture. The sample with C<sub>t</sub> 34  
151 showed CE on the third day, subsequent RT-PCR of this isolate was negative. The isolate with  
152 C<sub>t</sub> 36 did not show CE, subsequent RT-PCR of this isolate was negative as well. The  
153 supernatant of both cultures were monitored for 14 days without observing any other CE  
154 afterwards.

## 155 Discussion

156 In this study, although most of HCWs believed on the importance of cross-transmission and  
157 increased the adhesion to hand hygiene and MP disinfection during the pandemic, we  
158 identified SARS-CoV-2 on MPs. Our findings suggest the need of a universal policy in the  
159 infection-control guidelines on how to care for electronic devices in the hospital.

160 Little is known about virus on MPs or its potential for cross-contamination. A study of MPs  
161 from HCWs of a Paediatric unit<sup>6</sup> found virus RNA in 38.5% of the cases(42/109);  
162 predominantly Norovirus(n=39).

163 Two samples from a CPAP helmet used by COVID-19 patients, were positive by the RT-  
164 PCR[1] from patients who had 10 or more days of symptoms and were positive despite the fact  
165 that surfaces were cleaned twice a day<sup>1</sup>.

166 Pre-symptomatic COVID-19 patients can contaminate their surroundings as well. A study of  
167 quarantined asymptomatic students rooms showed that 8/22(36%) surfaces, including linen  
168 were positive. The students later developed COVID-19<sup>7</sup>. This study has limitations. It is not  
169 clear which is the best method to collect the SARS-CoV-2 from MPs. Furthermore, the C<sub>ts</sub>  
170 found are high and may be interpreted as having a small viral load<sup>8</sup>, although late amplification  
171 may have been caused by the freezing and thawing of the samples<sup>9,10</sup>.

## 172 **Conclusions**

173 Healthcare worker's MPs can be contaminated by SARS-CoV-2. Thus, it is possible MPs  
174 may be a part of the chain of virus transmission in healthcare settings.

175

176

177

178

179

180

181

182 **ACKNOWLEDGEMENTS**

183 We will like to thank all the health workers and scientists fighting anonymously every day  
184 during the pandemic.

185

186

187

188

189

190

191

192

193

194

195

196

197

198

199

200

201



## 202 REFERENCES

- 203 1. Colaneri M, Seminari E, Novati S, et al. SARS-CoV-2 RNA contamination of  
204 inanimate surfaces and virus viability in a health care emergency unit. *Clin Microbiol*  
205 *Infect.* 2020;Pre-proof.
- 206 2. Panigrahi SK, Pathak VK, Kumar MM, Raj U, Priya P K. Covid-19 and mobile phone  
207 hygiene in healthcare settings. *BMJ Glob Heal.* Published online 2020.
- 208 3. Lei H, Ye F, Liu X, et al. SARS-CoV-2 environmental contamination associated with  
209 persistently infected COVID-19 patients. *Influenza Other Respi Viruses.* Published  
210 online 2020.
- 211 4. Park WB, Kwon NJ, Choi SJ, et al. Virus isolation from the first patient with SARS-  
212 CoV-2 in Korea. *J Korean Med Sci.* Published online 2020.
- 213 5. Zhu N, Zhang D, Wang W, et al. A novel coronavirus from patients with pneumonia in  
214 China, 2019. *N Engl J Med.* 2020;382(8):727-733.
- 215 6. Pillet S, Berthelot P, Gagneux-Brunon A, et al. Contamination of healthcare workers'  
216 mobile phones by epidemic viruses. *Clin Microbiol Infect.* 2016;22(5):456.e1-456.e6.
- 217 7. Jiang F-C, Jiang X-L, Wang Z-G, et al. Detection of Severe Acute Respiratory  
218 Syndrome Coronavirus 2 RNA on Surfaces in Quarantine Rooms. *Emerging Infectious*  
219 *Diseases.*
- 220 8. Bullard J, Dust K, Funk D, Strong JE, Alexander D. Predicting infectious SARS-CoV-  
221 2 from diagnostic samples. *Oxford Univ Press Infect Dis Soc Am.*  
222 2012;0954162(478):1-4.
- 223 9. Greiff D, Blumenthal H, Chiga M, Pinkerton H. The effects on biological materials of  
224 freezing and drying by vacuum sublimation. II. Effect on influenza virus. *J Exp Med.*

225 1954;100(1):89-101.

226 10. World Health Organization. Laboratory testing for 2019 novel coronavirus (2019-  
227 nCoV) in suspected human cases. *WHO - Interim Guid.* 2020;2019(January):1-7.

228

229

230

231

232

233

234

235

236

237

238

239

240

241

242
